# Supplementary material
Source: HighWire-hosted journal article supplement (https://ijgc.bmj.com/highwire/filestream/26590/field_highwire_adjunct_files/0/ijgc-2022-003911supp001_data_supplement.pdf)

## Supplementary

|                                                                                                      |       |
|------------------------------------------------------------------------------------------------------|-------|
| Supplementary Document 1. Workflow for analyzing pathogenic variants                                 | p. 2  |
| Supplementary Table 1. Gene regions targeted in our single molecule molecular inversion probes panel | p. 5  |
| Supplementary Figure 1. Mean numbers of unique reads for each variant region                         | p. 6  |
| Supplementary Table 2. Coverage details per sequenced exon                                           | p. 8  |
| Supplementary Table 3. Baseline characteristics of each patient                                      | p. 11 |
| Supplementary Table 4. Identified pathogenic variants in the four specimens per patient              | p. 14 |
| Supplementary Document 2. Detection rate per sampling method by stage                                | p. 17 |

**Supplementary Document 1. Workflow for analyzing pathogenic variants****Tissue processing**

The cervicovaginal self-sample (Evalyn Brush, Rovers Medical Devices B.V., Oss, the Netherlands) was taken according to the manufacturer's instructions. The brush tips of the cervicovaginal self-sample and Pap smear were suspended in Preservcyt medium (Hologic, Marlborough, MA). The brush tips of the cervicovaginal self-sample were suspended in 4.5ml vials, which were vortexed for 3 x 15s, stored overnight at 4 °C, and again vortexed for 2 x 15s, before the brushes were removed and discarded. The samples were stored at room temperature until DNA extraction. A representative Formalin-Fixed Paraffin-Embedded surgical sample of the ovary was selected at the end of the surgery in both ovarian cancer patients and in women undergoing surgery for a benign gynecological condition (control group).

**DNA Extraction**

Representative areas of the ovarian cancer in the surgical specimens were marked and selected by macrodissection from 2 x 20 µm thick FFPE sections (C.R., J.B.). From the pipelle endometrial biopsies, two 20 µm thick sections were fully used for DNA extraction, without selecting tissue by macrodissection. The cervicovaginal self-samples and Pap smears were centrifuged for 5 minutes at 14.000 x g, after which the supernatant was transferred and the pellets were centrifuged for 1 minute at 14.000 x g. The remaining pellet was used for DNA extraction. These specimens were digested at 56°C overnight in TET-lysisbuffer (10mmol/L Tris/HCL pH8.5, 1mmol/L EDTA pH8.0, 0.01% Tween-20) with 5% Chelex-100 (Bio-Rad, Hercules, CA, US) and 0.2% proteinase K, followed by inactivation at 95°C for ten minutes. Subsequently, the supernatant was transferred after centrifugation into a clean tube. DNA concentration was determined using the Qubit Broad Range Kit (Thermo Fisher Scientific, Waltham, MA, US).

**Single molecule molecular inversion probes panel design and library preparation**

The samples were analyzed using single molecule Molecular Inversion Probes (Integrated DNA Technologies, Leuven, Belgium). The design of the single molecule Molecular Inversion Probes and the library preparation were performed as previously described [10]. Briefly, single molecule Molecular Inversion Probes were designed in a tiling manner for all included hotspots in oncogenes relevant in endometrial and ovarian cancer (*CTNNB1*, *KRAS*, *MTOR*, *PIK3CA* and *POLE*) and all coding and splice site sequences of tumor suppressor genes (*ARID1A*, *PTEN*, and *TP53*, **Supplementary Table**

1) preferentially targeting both strands with two independent single molecule Molecular Inversion Probes (probe sequences available on request). The single molecule Molecular Inversion Probes consisted of an extension and ligation probe arm, together 40bp long, with a gap of 112 bp, with a common backbone sequence for PCR-based library amplification. The ligation probe arm and backbone are connected with a backbone, also containing an 8bp degenerate sequence (8xN) serving as a Unique Molecular Identifier (UMI, also known as 'single molecule tag'). The single molecule Molecular Inversion Probes were mixed and phosphorylated using 1  $\mu$ L of T4 polynucleotide kinase (M0201; New England Biolabs, Ipswich, MA, US) per 25  $\mu$ L of 100  $\mu$ mol/L smMIPs and ATP-containing G4 DNA ligase buffer (B0202, New England Biolabs). The molecular ratio between gDNA and single molecule Molecular Inversion Probes was 1:3200 for every individual smMIP and the standard genomic DNA input was set at 100 ng.

A capture mix was made (total capture volume 25  $\mu$ L) containing the phosphorylated smMIP pool, 1 unit of Ampligase DNA ligase (A0110K; EpiBio, Madison, WI) and Ampligase Buffer (A1905B, DNA ligase buffer), 3.2 units of Hemo Klentaq (M0332; New England Biolabs), finally 8 mmol of dNTPs (28-4065-20/-12/-22/-32; GE Healthcare, Little Chalfont, UK) and, when available, 100 ng of genomic DNA in a 20  $\mu$ L volume. Subsequently, this capture mix was denatured (95°C for 10 minutes) and incubated for probe hybridization, extension and ligation at 60°C for 18 hours. After cooling, exonuclease treatment was performed by adding Exonuclease I (10 units; M0293; New England Biolabs) and III (50 units; M0206; New England Biolabs) and Ampligase Buffer to the capture mix (total of 27  $\mu$ L) and incubating at 37°C for 45 minutes, with subsequent inactivation at 95°C for 2 minutes. A total of 20  $\mu$ L was used for PCR in a total volume of 50  $\mu$ L including a common forward primer, bar-coded reverse primers, and iProof high fidelity master mix (1725310, Bio-Rad, Venendaal, the Netherlands). The resulting PCR products were pooled prior to purification with 0.8x volume of Agencourt Ampure XP Beads (A63881, Beckman Coulter, Woerden, the Netherlands). Each cytology sample was assessed in two independent library preparations, because of the expected low mutant allele frequencies.

### Sequencing and analysis

Sequencing of the purified libraries, denatured and diluted to 1.2pmol/L, was performed on a NexSeq500 device (Illumina, San Diego, CA, US) according to the manufacturer's instructions (300 cycles High Output sequencing kit, v2), resulting in 2x150bp paired-end reads. The resulting Bcl files were converted to fastq files and bar-coded reads were subsequently demultiplexed. Single-molecule-directed assembly of duplicate reads was performed to generate consensus ('unique') reads using the analysis software Sequence Pilot (version 4.4.0; JSI medical systems, Ettenheim,

Germany). For variant calling in Sequence Pilot, variant detection thresholds were generally set to 3% (surgical specimens and pipelles) or 1% (Pap smears and self-samples) of all unique reads at that position and a minimum of 5 unique reads representing  $\geq 3$  individual gDNA molecules.

Variants were classified as “pathogenic”, “likely pathogenic”, “variant of unknown significance”, “likely benign” and “benign” and the first three categories were considered (potentially) pathogenic. Synonymous variants were only considered when present at exon ends. Finally, intronic variants were excluded with the exception of splice site sequences. First, the surgical specimens (of ovarian cancer or a benign gynecological condition) were analyzed for the presence of somatic variants using variant calling. Subsequently, these variants were investigated in pipelle endometrial biopsies and the cytology samples, using a three-step method. First, variants yielded by variant calling were assessed. Second, all samples were manually screened for the presence of reads harboring the known variants. In case no variant was found in the surgical specimen, the cytology samples were searched for the presence of known hotspot variants in *CTNNB1*, *KRAS*, *MTOR*, *PIK3CA* and *POLE*.

After this, assessment of variants in the pipelle endometrial biopsies and cytology samples was performed, with adjusted variant calling settings for hotspots in oncogenes (minimum of 5 unique reads representing 3 gDNA molecules, without minimal variant allele frequencies). Settings for tumor suppressor genes were unadjusted.

To determine whether sufficient DNA molecules were sequenced to reliably (>95% certainty) exclude variants above a certain mutant allele frequency, a cumulative binomial distribution was used that calculated the required unique read depths [10]. For all surgical specimens and pipelle endometrial biopsies these required read depths were assessed in the context of the estimated tumor load (percentage of neoplastic cells). For all cytology samples, a unique read depth representing > 250 individual gDNA molecules at each hotspot position was pursued, in order to reduce the chance to less than 5% of missing variants with an variant allele frequency above 3%. In case hotspot positions were sequenced with insufficient unique read depth, library preparation and sequencing was repeated (once or twice if needed). Mean numbers of unique reads for each variant region are shown in **Supplementary Figure 1**.

In order to exclude potential false positive calls due to PCR, sequencing, or Formalin-Fixed Paraffin-Embedded deamination artifacts, the background was determined at all sequenced positions using 12 control Pap smears and cervicovaginal self-samples. Because proliferating endometrium could harbor *PIK3CA* and *KRAS* mutations, only cytology samples from patients with histo-pathologically proven atrophic endometrium were selected. The variant allele frequency to background (signal to noise) ratio was > 5 for all identified variants.

**Supplementary Table 2.** Gene regions targeted in our single molecule Molecular Inversion Probes panel

| Gene          | Exon    | Targeted codons                                 | Positions           | RefSeq ID   | Ensembl ID      |
|---------------|---------|-------------------------------------------------|---------------------|-------------|-----------------|
| <i>ARID1A</i> | 1 to 20 | M1-Stop2286                                     | c.1 to c.6858       | NM_006015.5 | ENST00000324856 |
| <i>CTNNB1</i> | 3       | D32-S45                                         | c.53 to c.146       | NM_001904.3 | ENST00000349496 |
| <i>KRAS</i>   | 2       | G12-G13                                         | c.9 to c.71         | NM_004985.4 | ENST00000311936 |
|               | 3       | A59-Q61                                         | c.122 to c.215      |             |                 |
|               | 4       | K117, A146                                      | c.291-5 to c.357    |             |                 |
|               |         |                                                 | c.402 to c.450+5    |             |                 |
| <i>MTOR</i>   | 30      | D1458-E1489                                     | c.4371 to c.4469+5  | NM_004958.3 | ENST00000361445 |
|               | 39      | A1789-A1820                                     | c.5365-5 to c.5460  |             |                 |
|               | 43      | A1971-L1995                                     | c.5911-5 to c.5985  |             |                 |
|               | 47      | Q2194-L2220                                     | c.6580 to c.6662+5  |             |                 |
|               | 53      | M2404-D243                                      | c.7210 to c.7300+5  |             |                 |
|               | 56      | G2484-T2509                                     | c.7448-5 to c.7527  |             |                 |
| <i>PIK3CA</i> | 10      | E542-Q546                                       | c.1558 to c.1664+5  | NM_006218.3 | ENST00000263967 |
|               | 21      | M1043-G1049                                     | c.3058 to c.3207+10 |             |                 |
| <i>POLE</i>   | 9 to 14 | D268-E491                                       | c.802-5 to c.1473+5 | NM_006231.3 | ENST00000320574 |
| <i>PTEN</i>   | 1 to 9  | M1-Stop404                                      | c.1 to c.1210+5     | NM_000314.6 | ENST00000371953 |
| <i>TP53</i>   | 2 to 11 | >95% of all coding and splice sequences (-5/+5) | c.1 to c.1180+5     | NM_000565.5 | ENST00000269305 |

Supplementary Figure 1. Mean numbers of unique reads for each variant region

## A. Ovarian cancer patients (n=29)

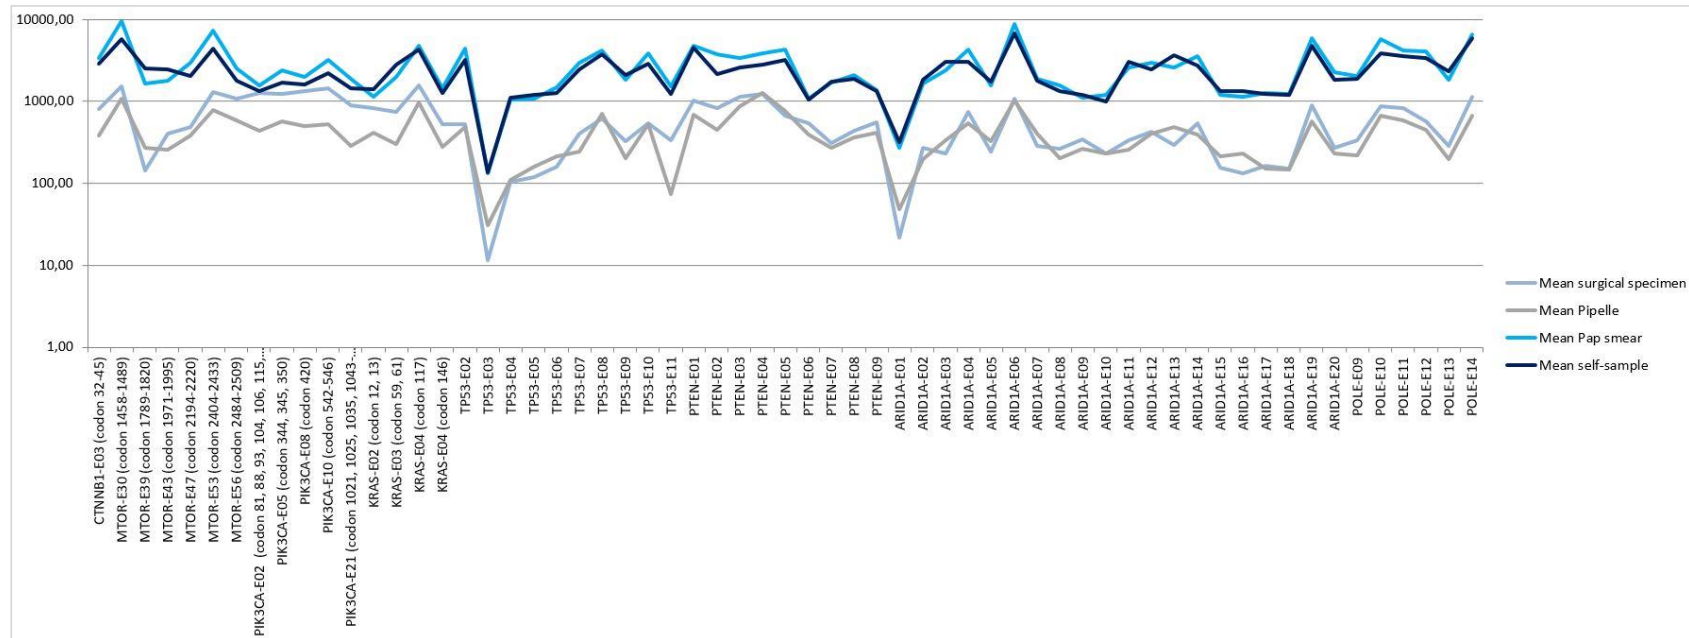

## B. Control patients (n=32)

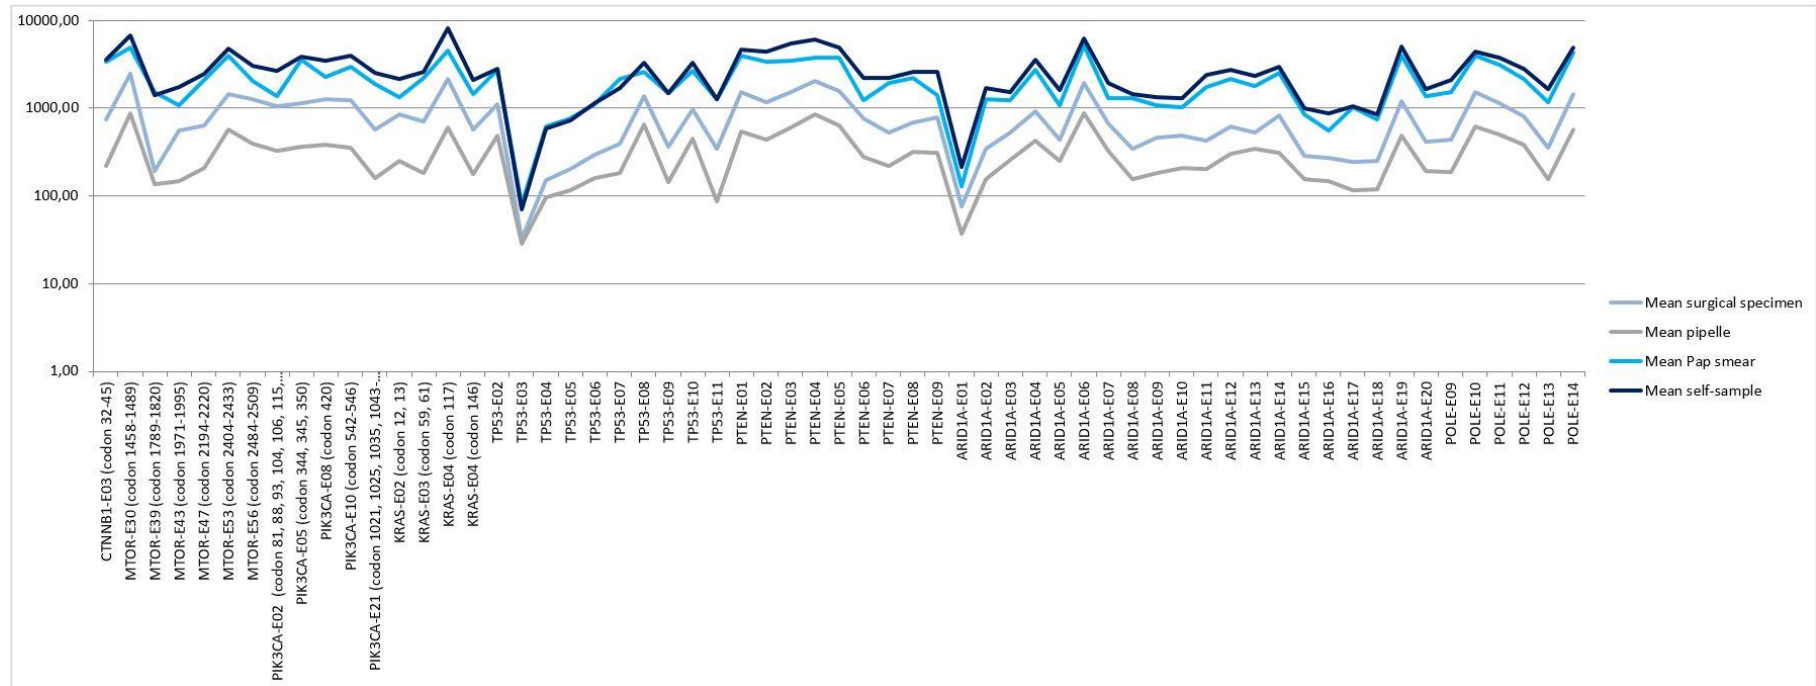

Supplementary Table 2. Coverage details per sequenced exon

| Exon                                                 | Ovarian cancer patients |        |        |           |        |         |         |      |        |                   |       |        | Control patients |        |         |           |        |        |         |       |        |                   |        |        |
|------------------------------------------------------|-------------------------|--------|--------|-----------|--------|---------|---------|------|--------|-------------------|-------|--------|------------------|--------|---------|-----------|--------|--------|---------|-------|--------|-------------------|--------|--------|
|                                                      | Self-sample             |        |        | Pap smear |        |         | Pipelle |      |        | Surgical specimen |       |        | Self-sample      |        |         | Pap smear |        |        | Pipelle |       |        | Surgical specimen |        |        |
|                                                      | Mean                    | P25    | P75    | Mean      | P25    | P75     | Mean    | P25  | P75    | Mean              | P25   | P75    | Mean             | P25    | P75     | Mean      | P25    | P75    | Mean    | P25   | P75    | Mean              | P25    | P75    |
| CTNNB1-E03 (codon 32-45)                             | 2861.5                  | 872.5  | 4443.5 | 3408.4    | 1854.0 | 4575.0  | 387.0   | 35.0 | 562.5  | 796.6             | 122.5 | 1139.3 | 3597.7           | 1755.3 | 4332.3  | 3381.1    | 1578.0 | 4083.0 | 222.2   | 36.0  | 346.0  | 753.4             | 408.0  | 786.0  |
| MTOR-E30 (codon 1458-1489)                           | 5759.2                  | 1361.0 | 7908.0 | 9585.1    | 2979.0 | 15141.0 | 1068.9  | 96.0 | 1523.0 | 1536.1            | 420.0 | 1979.8 | 6746.8           | 2850.0 | 7926.5  | 4944.3    | 2660.0 | 6212.0 | 866.0   | 142.0 | 1322.0 | 2497.9            | 1486.0 | 2946.0 |
| MTOR-E39 (codon 1789-1820)                           | 2510.0                  | 416.0  | 3382.0 | 1658.7    | 800.0  | 2288.0  | 274.9   | 13.0 | 412.0  | 145.4             | 24.5  | 210.0  | 1416.7           | 611.5  | 2032.3  | 1518.9    | 557.0  | 1908.0 | 137.7   | 16.0  | 186.0  | 191.8             | 72.0   | 180.0  |
| MTOR-E43 (codon 1971-1995)                           | 2476.8                  | 1136.5 | 3708.0 | 1805.4    | 865.0  | 2678.0  | 255.1   | 17.0 | 364.0  | 400.2             | 83.8  | 573.3  | 1727.1           | 988.0  | 2028.5  | 1081.7    | 556.0  | 1610.0 | 146.5   | 20.0  | 214.0  | 551.0             | 352.0  | 682.0  |
| MTOR-E47 (codon 2194-2220)                           | 2037.1                  | 722.5  | 3208.0 | 2955.1    | 1344.0 | 3986.0  | 380.1   | 24.0 | 537.0  | 491.4             | 107.5 | 609.0  | 2488.6           | 1344.5 | 2917.5  | 2116.6    | 1239.0 | 2591.0 | 208.1   | 56.0  | 308.0  | 640.9             | 368.0  | 689.0  |
| MTOR-E53 (codon 2404-2433)                           | 4373.2                  | 998.0  | 5537.5 | 7281.9    | 1604.0 | 12030.0 | 786.3   | 64.0 | 1114.0 | 1294.8            | 316.0 | 1494.5 | 4831.7           | 1634.5 | 6646.0  | 3940.9    | 2118.0 | 5273.0 | 576.1   | 148.0 | 838.0  | 1428.6            | 972.0  | 1950.0 |
| MTOR-E56 (codon 2484-2509)                           | 1801.1                  | 434.0  | 2466.0 | 2542.4    | 675.0  | 3796.0  | 585.1   | 47.0 | 754.0  | 1084.8            | 202.0 | 1339.0 | 3067.8           | 1312.5 | 4230.8  | 2043.2    | 620.0  | 3022.0 | 393.8   | 40.0  | 660.0  | 1272.3            | 762.0  | 1724.0 |
| PIK3CA-E02 (codon 81, 88, 93, 104, 106, 115, 118)    | 1326.9                  | 378.0  | 1886.0 | 1574.0    | 300.0  | 1930.0  | 435.3   | 24.0 | 620.0  | 1278.4            | 278.0 | 1355.0 | 2637.3           | 1007.0 | 3315.0  | 1353.8    | 480.0  | 1906.0 | 331.0   | 32.0  | 558.0  | 1059.9            | 684.0  | 1396.0 |
| PIK3CA-E05 (codon 344, 345, 350)                     | 1715.9                  | 895.5  | 2369.0 | 2428.5    | 862.0  | 3204.0  | 571.1   | 44.0 | 776.0  | 1247.0            | 372.0 | 1217.8 | 3854.3           | 2400.0 | 5360.3  | 3527.1    | 1926.0 | 5059.0 | 368.0   | 54.0  | 580.0  | 1130.5            | 714.0  | 1284.0 |
| PIK3CA-E08 (codon 420)                               | 1611.9                  | 400.5  | 2536.5 | 2002.8    | 570.0  | 2554.0  | 495.0   | 38.0 | 692.0  | 1342.9            | 362.0 | 1417.5 | 3455.3           | 1652.8 | 4912.3  | 2291.7    | 796.0  | 3704.0 | 383.7   | 28.0  | 652.0  | 1254.2            | 790.0  | 1674.0 |
| PIK3CA-E10 (codon 542-546)                           | 2219.6                  | 705.0  | 3184.0 | 3245.4    | 1293.0 | 4495.0  | 523.5   | 47.0 | 739.0  | 1445.8            | 339.8 | 1409.0 | 3963.1           | 1901.0 | 5747.0  | 2974.8    | 1424.0 | 3986.0 | 352.2   | 44.0  | 590.0  | 1235.1            | 741.0  | 1583.0 |
| PIK3CA-E21 (codon 1021, 1025, 1035, 1043-1049, 1069) | 1465.3                  | 564.0  | 2378.5 | 1906.0    | 1072.0 | 2696.0  | 290.1   | 30.0 | 420.0  | 904.0             | 190.5 | 965.0  | 2513.1           | 1532.3 | 3545.8  | 1897.0    | 1037.0 | 2356.0 | 161.1   | 18.0  | 260.0  | 567.4             | 340.0  | 680.0  |
| KRAS-E02 (codon 12, 13)                              | 1398.0                  | 301.0  | 1808.0 | 1147.6    | 130.0  | 1722.0  | 418.7   | 29.0 | 586.0  | 822.1             | 151.0 | 1072.0 | 2147.2           | 833.0  | 3126.5  | 1322.5    | 312.0  | 2101.0 | 252.6   | 18.0  | 418.0  | 860.4             | 554.0  | 1182.0 |
| KRAS-E03 (codon 59, 61)                              | 2804.1                  | 1264.5 | 4135.5 | 1996.5    | 1118.0 | 2744.0  | 304.0   | 38.0 | 449.0  | 746.0             | 107.5 | 1095.0 | 2599.2           | 1447.8 | 3718.3  | 2218.3    | 1004.0 | 3010.0 | 184.3   | 18.0  | 264.0  | 715.0             | 420.0  | 858.0  |
| KRAS-E04 (codon 117)                                 | 4252.0                  | 1758.5 | 6797.0 | 4795.2    | 2433.0 | 5970.0  | 971.7   | 77.0 | 1248.0 | 1557.4            | 438.0 | 2006.5 | 8186.1           | 4196.5 | 11352.5 | 4554.1    | 2827.0 | 6478.0 | 609.5   | 64.0  | 952.0  | 2163.5            | 1376.0 | 2549.0 |
| KRAS-E04 (codon 146)                                 | 1274.2                  | 367.0  | 1889.5 | 1441.8    | 398.0  | 2242.0  | 282.2   | 19.0 | 399.0  | 523.6             | 133.5 | 645.5  | 2123.8           | 946.8  | 3088.5  | 1456.4    | 446.0  | 2176.0 | 176.1   | 16.0  | 290.0  | 577.9             | 370.0  | 757.0  |
| TP53-E02                                             | 3190.1                  | 1246.7 | 5058.8 | 4406.8    | 3314.6 | 5814.9  | 490.6   | 59.8 | 850.7  | 531.1             | 128.6 | 532.4  | 2802.1           | 1283.6 | 4023.1  | 2705.8    | 1475.4 | 3187.6 | 491.5   | 114.0 | 591.0  | 1105.1            | 550.0  | 1370.5 |
| TP53-E03                                             | 136.9                   | 60.0   | 155.0  | 133.7     | 56.0   | 202.0   | 31.2    | 2.0  | 46.0   | 11.6              | 2.0   | 14.0   | 70.5             | 35.5   | 101.5   | 79.6      | 58.0   | 94.0   | 28.6    | 6.0   | 46.0   | 32.6              | 14.0   | 46.0   |
| TP53-E04                                             | 1101.2                  | 514.9  | 1679.7 | 1056.9    | 699.1  | 1469.5  | 111.4   | 15.0 | 194.9  | 105.1             | 29.0  | 128.8  | 584.0            | 291.1  | 827.7   | 623.0     | 346.9  | 830.4  | 96.5    | 21.7  | 126.2  | 153.1             | 99.0   | 205.0  |
| TP53-E05                                             | 1212.3                  | 363.7  | 1658.7 | 1080.1    | 353.3  | 1626.2  | 159.6   | 22.4 | 257.5  | 118.0             | 25.8  | 157.5  | 732.8            | 347.2  | 1014.2  | 764.0     | 348.1  | 1064.6 | 114.8   | 37.3  | 154.8  | 201.3             | 96.6   | 205.1  |



|            |        |        |         |        |        |         |        |       |        |        |       |        |        |        |        |        |        |        |       |       |        |        |        |        |
|------------|--------|--------|---------|--------|--------|---------|--------|-------|--------|--------|-------|--------|--------|--------|--------|--------|--------|--------|-------|-------|--------|--------|--------|--------|
| TP53-E06   | 1282.0 | 543.9  | 1960.0  | 1498.4 | 879.0  | 2173.8  | 214.8  | 28.8  | 373.6  | 157.9  | 33.9  | 173.0  | 1143.6 | 586.2  | 1475.0 | 1123.5 | 597.4  | 1456.4 | 159.5 | 35.3  | 223.6  | 294.7  | 161.5  | 284.6  |
| TP53-E07   | 2464.8 | 1134.9 | 3813.8  | 2977.0 | 1745.9 | 3786.5  | 243.9  | 27.5  | 387.2  | 405.2  | 94.0  | 369.0  | 1673.7 | 741.8  | 2148.1 | 2163.2 | 756.2  | 2815.6 | 180.7 | 43.2  | 247.2  | 391.8  | 187.3  | 503.8  |
| TP53-E08   | 3752.0 | 1730.3 | 5399.1  | 4196.0 | 2099.1 | 5729.4  | 708.0  | 73.5  | 1208.4 | 615.0  | 145.6 | 766.7  | 3267.1 | 1934.8 | 4527.0 | 2577.8 | 1624.3 | 3195.9 | 648.3 | 174.7 | 862.9  | 1377.4 | 844.4  | 1617.8 |
| TP53-E09   | 2081.6 | 883.4  | 2867.1  | 1837.4 | 1077.7 | 2666.9  | 200.8  | 18.8  | 336.2  | 326.3  | 75.6  | 397.7  | 1489.6 | 834.8  | 2025.0 | 1472.2 | 765.4  | 2088.4 | 143.0 | 31.0  | 181.6  | 366.5  | 230.9  | 457.7  |
| TP53-E10   | 2889.5 | 784.6  | 4786.0  | 3884.5 | 2196.3 | 4888.3  | 529.6  | 46.5  | 875.9  | 542.0  | 141.7 | 707.6  | 3295.2 | 1697.9 | 4373.0 | 2645.0 | 1515.9 | 3412.9 | 454.9 | 111.1 | 547.8  | 971.5  | 539.6  | 1050.4 |
| TP53-E11   | 1233.2 | 622.6  | 1493.9  | 1508.4 | 972.7  | 2215.9  | 73.8   | 12.3  | 106.9  | 334.9  | 103.0 | 462.8  | 1264.2 | 757.8  | 1641.1 | 1266.9 | 633.3  | 1451.0 | 87.1  | 15.4  | 83.2   | 343.1  | 155.9  | 388.9  |
| PTEN-E01   | 4572.0 | 2469.6 | 6255.9  | 4722.7 | 3209.1 | 6046.1  | 693.4  | 86.7  | 1149.8 | 1019.7 | 249.2 | 1286.0 | 4715.7 | 3053.0 | 5921.6 | 3966.5 | 2577.1 | 5144.4 | 545.6 | 111.3 | 652.4  | 1530.2 | 964.9  | 1681.8 |
| PTEN-E02   | 2129.7 | 1161.6 | 2947.7  | 3737.4 | 2058.7 | 4881.2  | 453.3  | 37.8  | 645.8  | 835.0  | 205.2 | 1047.9 | 4465.2 | 2460.5 | 6160.4 | 3353.6 | 1609.8 | 4641.8 | 438.6 | 60.9  | 569.7  | 1155.6 | 661.7  | 1289.4 |
| PTEN-E03   | 2583.2 | 788.0  | 3736.5  | 3419.2 | 747.0  | 5184.0  | 871.7  | 46.0  | 1196.0 | 1130.8 | 334.0 | 1641.8 | 5496.7 | 2404.5 | 7613.8 | 3480.0 | 935.0  | 5685.0 | 601.9 | 64.0  | 826.0  | 1505.5 | 916.0  | 1882.0 |
| PTEN-E04   | 2811.1 | 905.5  | 3619.0  | 3859.6 | 894.0  | 5950.0  | 1254.7 | 80.0  | 1943.0 | 1250.0 | 399.5 | 1732.5 | 6036.4 | 2813.0 | 9348.8 | 3774.7 | 1022.0 | 6208.0 | 843.5 | 126.0 | 1164.0 | 2053.9 | 1020.0 | 2343.0 |
| PTEN-E05   | 3174.1 | 1502.1 | 5304.4  | 4253.1 | 2354.9 | 5383.2  | 768.4  | 61.8  | 1167.2 | 667.5  | 234.7 | 755.6  | 4844.3 | 2597.3 | 6325.7 | 3766.8 | 2176.6 | 4769.4 | 635.1 | 124.9 | 836.7  | 1584.5 | 916.0  | 1602.4 |
| PTEN-E06   | 1049.5 | 428.0  | 1390.1  | 1075.7 | 350.4  | 1429.2  | 389.2  | 25.8  | 573.5  | 537.1  | 137.0 | 666.9  | 2223.6 | 1302.4 | 2884.1 | 1230.7 | 460.8  | 1747.7 | 278.4 | 21.8  | 411.1  | 765.8  | 313.9  | 905.9  |
| PTEN-E07   | 1741.5 | 836.3  | 2614.2  | 1707.5 | 1173.7 | 2054.1  | 273.2  | 32.9  | 390.3  | 310.9  | 105.6 | 404.1  | 2208.3 | 1215.4 | 2945.4 | 1937.8 | 1129.0 | 2130.9 | 217.6 | 27.2  | 253.9  | 520.1  | 308.5  | 590.4  |
| PTEN-E08   | 1864.1 | 946.7  | 2601.4  | 2121.2 | 1367.5 | 2787.4  | 367.8  | 38.1  | 534.0  | 438.2  | 162.7 | 558.3  | 2589.3 | 1542.5 | 3434.7 | 2188.7 | 1326.5 | 2780.6 | 313.9 | 50.0  | 440.2  | 691.8  | 425.0  | 853.3  |
| PTEN-E09   | 1341.7 | 433.5  | 1822.7  | 1372.7 | 428.6  | 2171.5  | 413.0  | 30.1  | 546.6  | 557.9  | 180.8 | 736.1  | 2610.7 | 1329.3 | 3459.5 | 1423.6 | 773.7  | 1963.3 | 305.8 | 41.1  | 399.3  | 779.3  | 477.1  | 888.8  |
| ARID1A-E01 | 318.8  | 113.9  | 420.9   | 271.6  | 126.9  | 400.6   | 48.9   | 5.8   | 61.8   | 21.9   | 7.2   | 36.5   | 214.2  | 109.5  | 253.8  | 129.8  | 62.6   | 162.0  | 37.3  | 12.9  | 50.8   | 75.8   | 38.8   | 86.1   |
| ARID1A-E02 | 1838.2 | 600.1  | 2835.2  | 1671.7 | 1203.1 | 2146.9  | 199.7  | 18.5  | 301.2  | 271.7  | 73.9  | 362.6  | 1694.0 | 1034.1 | 2050.4 | 1273.5 | 703.7  | 1595.6 | 154.8 | 37.2  | 175.0  | 342.0  | 220.2  | 390.8  |
| ARID1A-E03 | 3052.3 | 1451.8 | 4105.8  | 2424.9 | 1312.6 | 3569.5  | 334.8  | 44.2  | 569.7  | 234.5  | 58.5  | 261.1  | 1524.3 | 798.5  | 2124.7 | 1240.4 | 742.5  | 1725.2 | 254.0 | 71.7  | 336.0  | 524.0  | 297.5  | 537.6  |
| ARID1A-E04 | 3021.1 | 1131.3 | 4525.8  | 4336.7 | 2172.9 | 6045.6  | 547.0  | 55.6  | 812.1  | 751.7  | 168.7 | 952.5  | 3574.4 | 1968.8 | 4664.6 | 2772.1 | 1666.7 | 3833.6 | 430.7 | 72.3  | 479.0  | 917.6  | 585.2  | 1114.9 |
| ARID1A-E05 | 1759.3 | 669.4  | 2763.3  | 1570.6 | 994.9  | 2118.5  | 328.5  | 30.1  | 529.9  | 245.7  | 57.8  | 304.2  | 1597.9 | 959.3  | 2160.3 | 1093.7 | 609.8  | 1518.9 | 250.3 | 58.7  | 305.7  | 437.6  | 255.7  | 481.5  |
| ARID1A-E06 | 6811.6 | 2524.2 | 10819.3 | 8718.4 | 4741.8 | 13472.0 | 1036.0 | 107.2 | 1634.0 | 1070.2 | 269.3 | 1372.0 | 6204.8 | 3765.6 | 7308.9 | 5193.8 | 2945.4 | 6536.8 | 873.6 | 238.0 | 1105.8 | 1927.9 | 1082.9 | 2295.2 |
| ARID1A-E07 | 1785.2 | 702.0  | 2439.4  | 1884.9 | 950.9  | 2439.8  | 408.9  | 39.3  | 671.6  | 286.1  | 85.7  | 398.2  | 1917.1 | 1165.7 | 2673.5 | 1296.0 | 722.2  | 1670.5 | 323.9 | 81.7  | 440.5  | 672.6  | 448.1  | 718.2  |
| ARID1A-E08 | 1346.9 | 483.3  | 2144.2  | 1582.8 | 1187.7 | 2043.8  | 203.9  | 20.7  | 315.3  | 264.3  | 68.8  | 334.7  | 1449.5 | 813.5  | 1829.3 | 1302.6 | 676.1  | 1694.2 | 155.5 | 30.1  | 194.0  | 346.0  | 201.1  | 393.9  |
| ARID1A-E09 | 1209.3 | 500.2  | 1556.2  | 1121.0 | 708.2  | 1540.9  | 262.6  | 24.9  | 406.3  | 342.4  | 81.9  | 478.6  | 1340.9 | 713.1  | 1953.5 | 1085.4 | 655.3  | 1402.6 | 183.0 | 25.4  | 194.9  | 455.4  | 280.7  | 550.2  |
| ARID1A-E10 | 1007.5 | 598.5  | 1256.7  | 1214.9 | 774.2  | 1549.8  | 230.2  | 25.3  | 386.1  | 230.7  | 59.5  | 285.2  | 1301.1 | 808.1  | 1799.1 | 1022.5 | 701.9  | 1375.6 | 207.8 | 44.0  | 296.2  | 491.6  | 283.8  | 589.3  |
| ARID1A-E11 | 3023.7 | 1074.7 | 4673.5  | 2614.6 | 1583.1 | 3535.4  | 257.0  | 28.0  | 366.6  | 333.3  | 78.0  | 442.4  | 2426.7 | 1379.7 | 3051.8 | 1737.4 | 940.8  | 2174.3 | 200.9 | 45.2  | 230.9  | 430.4  | 242.6  | 474.8  |
| ARID1A-E12 | 2464.6 | 1164.9 | 4001.5  | 2979.6 | 1939.6 | 4023.9  | 406.8  | 44.1  | 642.1  | 429.8  | 135.5 | 535.1  | 2720.7 | 1472.8 | 3539.4 | 2132.9 | 1322.8 | 2755.1 | 305.6 | 57.4  | 356.1  | 623.0  | 370.8  | 687.7  |
| ARID1A-E13 | 3641.2 | 1567.0 | 5298.0  | 2574.0 | 1106.5 | 3911.0  | 487.2  | 58.6  | 820.3  | 291.8  | 73.5  | 417.6  | 2330.4 | 1134.6 | 3054.7 | 1775.4 | 1032.7 | 2309.9 | 341.3 | 80.8  | 440.2  | 533.5  | 249.8  | 636.1  |
| ARID1A-E14 | 2765.4 | 1231.4 | 4329.0  | 3550.6 | 2651.0 | 4769.6  | 396.7  | 52.3  | 599.0  | 541.8  | 119.3 | 672.4  | 2951.6 | 1662.2 | 3895.9 | 2554.1 | 1544.5 | 3357.3 | 313.7 | 73.1  | 390.3  | 824.1  | 476.5  | 785.4  |
| ARID1A-E15 | 1352.7 | 453.0  | 2121.9  | 1197.1 | 632.9  | 1617.2  | 211.6  | 21.6  | 355.3  | 154.0  | 41.6  | 216.2  | 1001.7 | 449.4  | 1294.1 | 838.9  | 410.2  | 1162.9 | 153.3 | 28.6  | 214.7  | 288.2  | 166.0  | 273.7  |

|                                                                                                                                                                                                                                                          |        |        |        |        |        |        |       |      |        |        |       |        |        |        |        |        |        |        |       |       |       |        |       |        |
|----------------------------------------------------------------------------------------------------------------------------------------------------------------------------------------------------------------------------------------------------------|--------|--------|--------|--------|--------|--------|-------|------|--------|--------|-------|--------|--------|--------|--------|--------|--------|--------|-------|-------|-------|--------|-------|--------|
| ARID1A-E16                                                                                                                                                                                                                                               | 1324.4 | 608.6  | 1957.8 | 1155.0 | 728.7  | 1899.8 | 232.8 | 22.7 | 402.3  | 134.0  | 31.8  | 195.1  | 871.6  | 473.4  | 1162.0 | 561.3  | 328.2  | 770.3  | 147.9 | 41.4  | 220.2 | 274.1  | 161.5 | 289.9  |
| ARID1A-E17                                                                                                                                                                                                                                               | 1222.8 | 426.0  | 2017.8 | 1259.3 | 635.8  | 1739.5 | 153.3 | 16.6 | 240.5  | 165.5  | 34.4  | 221.3  | 1039.8 | 480.2  | 1568.9 | 1011.6 | 450.0  | 1272.7 | 116.7 | 27.9  | 160.1 | 243.5  | 131.4 | 247.6  |
| ARID1A-E18                                                                                                                                                                                                                                               | 1203.3 | 440.1  | 1812.9 | 1221.1 | 722.2  | 1549.9 | 147.7 | 19.1 | 250.7  | 153.3  | 39.7  | 184.4  | 841.7  | 505.3  | 1075.0 | 739.7  | 512.4  | 923.5  | 120.1 | 28.4  | 157.1 | 247.6  | 147.1 | 272.8  |
| ARID1A-E19                                                                                                                                                                                                                                               | 4809.4 | 1504.9 | 7174.3 | 5997.1 | 2456.5 | 8553.2 | 574.8 | 57.4 | 860.7  | 901.3  | 181.2 | 1035.9 | 4990.0 | 2897.5 | 6147.3 | 3921.6 | 2066.7 | 5136.4 | 483.6 | 82.5  | 541.2 | 1215.3 | 654.2 | 1141.3 |
| ARID1A-E20                                                                                                                                                                                                                                               | 1859.0 | 675.1  | 3026.4 | 2257.9 | 1677.6 | 3086.6 | 229.9 | 30.2 | 360.1  | 272.3  | 70.3  | 320.8  | 1669.3 | 909.5  | 1986.1 | 1387.5 | 829.4  | 1789.9 | 193.3 | 42.8  | 232.8 | 418.1  | 258.8 | 419.8  |
| POLE-E09                                                                                                                                                                                                                                                 | 1873.4 | 818.8  | 2893.4 | 2036.2 | 1559.1 | 2915.9 | 221.8 | 18.4 | 355.6  | 338.8  | 97.8  | 415.9  | 2098.9 | 1296.7 | 2729.6 | 1525.2 | 845.6  | 1913.0 | 184.6 | 30.6  | 208.8 | 435.7  | 239.0 | 514.7  |
| POLE-E10                                                                                                                                                                                                                                                 | 3853.3 | 1564.1 | 5809.0 | 5764.9 | 2816.0 | 8392.7 | 673.8 | 62.7 | 1104.9 | 874.2  | 230.6 | 1374.3 | 4446.4 | 2563.0 | 5797.0 | 4015.1 | 2128.0 | 4787.3 | 612.7 | 133.7 | 768.9 | 1508.8 | 864.8 | 1726.7 |
| POLE-E11                                                                                                                                                                                                                                                 | 3543.9 | 1289.3 | 5650.8 | 4197.8 | 2087.1 | 6443.6 | 585.9 | 71.4 | 895.7  | 828.0  | 191.2 | 1188.2 | 3808.2 | 2327.9 | 4546.5 | 3127.6 | 1740.5 | 4133.1 | 504.6 | 103.4 | 544.9 | 1125.0 | 634.1 | 1431.1 |
| POLE-E12                                                                                                                                                                                                                                                 | 3399.6 | 883.6  | 5971.3 | 4066.8 | 2167.3 | 6869.9 | 449.9 | 54.6 | 725.1  | 571.2  | 131.2 | 834.8  | 2841.2 | 1251.4 | 3479.2 | 2147.4 | 1250.0 | 2706.8 | 386.2 | 86.9  | 451.8 | 813.1  | 475.9 | 975.3  |
| POLE-E13                                                                                                                                                                                                                                                 | 2362.9 | 919.8  | 2892.7 | 1845.1 | 1008.5 | 2892.4 | 196.7 | 17.0 | 316.4  | 285.5  | 67.5  | 361.5  | 1659.6 | 950.3  | 1728.5 | 1168.3 | 631.7  | 1427.4 | 155.4 | 42.8  | 158.6 | 349.2  | 220.3 | 471.4  |
| POLE-E14                                                                                                                                                                                                                                                 | 5913.6 | 2696.5 | 9011.5 | 6653.9 | 3967.5 | 9931.1 | 675.5 | 73.6 | 1070.7 | 1149.4 | 196.8 | 1693.0 | 4962.1 | 2952.0 | 5940.0 | 4307.1 | 2299.5 | 5670.8 | 567.9 | 124.1 | 675.7 | 1451.6 | 745.0 | 1688.5 |
| Total mean                                                                                                                                                                                                                                               | 2414.1 | 918.4  | 3578.8 | 2832.6 | 1412.9 | 4032.3 | 422.6 | 39.5 | 639.9  | 600.9  | 149.0 | 753.5  | 2759.8 | 1450.6 | 3645.0 | 2139.8 | 1107.1 | 2851.6 | 321.5 | 60.1  | 432.6 | 814.7  | 475.8 | 955.4  |
| Percentage of exons with mean coverage >250 reads                                                                                                                                                                                                        | 98%    |        |        | 98%    |        |        | 71%   |      |        | 79%    |       |        | 97%    |        |        | 97%    |        |        | 54%   |       |       | 89%    |       |        |
| P25, 25 <sup>th</sup> percentile; P75, 75 <sup>th</sup> percentile.<br>A mean coverage of >250 reads reflects a probability of 95% to detect a pathogenic variant [1]                                                                                    |        |        |        |        |        |        |       |      |        |        |       |        |        |        |        |        |        |        |       |       |       |        |       |        |
| [1] Eijkelenboom A, Kamping EJ, Kastner-van Raaij AW, Hendriks-Cornelissen SJ, Neveling K, Kuiper RP, et al. Reliable Next-Generation Sequencing of Formalin-Fixed, Paraffin-Embedded Tissue Using Single Molecule Tags. J Mol Diagn. 2016;18(6):851-63. |        |        |        |        |        |        |       |      |        |        |       |        |        |        |        |        |        |        |       |       |       |        |       |        |

**Supplementary Table 3.** Baseline characteristics of each patient

| Patient ID                     | Age | Histological diagnosis      | Stage     | Variants in surgical specimen | Variants in self-sample | Overlapping variants: surgical specimen and self-sample | Variants in Pap smear | Overlapping variants: surgical specimen and Pap smear | Variants in pipelle | Overlapping variants: surgical specimen and pipelle | Note             |
|--------------------------------|-----|-----------------------------|-----------|-------------------------------|-------------------------|---------------------------------------------------------|-----------------------|-------------------------------------------------------|---------------------|-----------------------------------------------------|------------------|
| <b>Ovarian cancer patients</b> |     |                             |           |                               |                         |                                                         |                       |                                                       |                     |                                                     |                  |
| 8                              | 76  | HGSC                        | 3B        | 2                             | 0                       | 0                                                       | 0                     | 0                                                     | 0                   | 0                                                   |                  |
| 10                             | 41  | MMMT                        | 3B        | 1                             | 0                       | 0                                                       | 0                     | 0                                                     | 0                   | 0                                                   |                  |
| 18                             | 70  | HGSC                        | 3C        | 1                             | 0                       | 0                                                       | 1                     | 1                                                     | 0                   | 0                                                   |                  |
| 20                             | 65  | HGSC                        | 2A        | 1                             | 0                       | 0                                                       | 1                     | 1                                                     | 0                   | 0                                                   |                  |
| 32                             | 49  | <i>Borderline</i>           | <i>NA</i> | <i>0</i>                      | <i>0</i>                | <i>0</i>                                                | <i>0</i>              | <i>0</i>                                              | <i>0</i>            | <i>0</i>                                            | <i>Excluded*</i> |
| 39                             | 71  | <i>Borderline serous</i>    | <i>NA</i> | <i>0</i>                      | <i>0</i>                | <i>0</i>                                                | <i>0</i>              | <i>0</i>                                              | <i>0</i>            | <i>0</i>                                            | <i>Excluded*</i> |
| 40                             | 66  | HGSC                        | 3C        | 0                             | 2                       | 0                                                       | 1                     | 0                                                     | 1                   | 0                                                   |                  |
| 44                             | 32  | HGSC                        | 3C        | 0                             | 0                       | 0                                                       | 1                     | 0                                                     | 0                   | 0                                                   |                  |
| 45                             | 60  | HGSC                        | 2B        | 1                             | 0                       | 0                                                       | <i>NA</i>             | <i>NA</i>                                             | 0                   | 0                                                   |                  |
| 49                             | 50  | Clear cell                  | 3B        | 0                             | 0                       | 0                                                       | 0                     | 0                                                     | 0                   | 0                                                   |                  |
| 54                             | 61  | <i>HGSC</i>                 | <i>4</i>  | <i>0</i>                      | <i>0</i>                | <i>0</i>                                                | <i>0</i>              | <i>0</i>                                              | <i>0</i>            | <i>0</i>                                            | <i>Excluded*</i> |
| 55                             | 42  | HGSC                        | 3C        | 0                             | 1                       | 0                                                       | 0                     | 0                                                     | 1                   | 0                                                   |                  |
| 58                             | 55  | Clear cell/serous           | 3A        | 0                             | 1                       | 0                                                       | 1                     | 0                                                     | 0                   | 0                                                   |                  |
| 63                             | 80  | HGSC                        | 1C        | 1                             | 0                       | 0                                                       | <i>NA</i>             | <i>NA</i>                                             | 0                   | 0                                                   |                  |
| 65                             | 58  | HGSC                        | 3C        | 1                             | 0                       | 0                                                       | 0                     | 0                                                     | <i>NA</i>           | <i>NA</i>                                           |                  |
| 72                             | 59  | Clear cell/serous           | 4         | 1                             | 0                       | 0                                                       | 0                     | 0                                                     | 0                   | 0                                                   |                  |
| 77                             | 75  | HGSC                        | 3C        | 1                             | 0                       | 0                                                       | 0                     | 0                                                     | <i>NA</i>           | <i>NA</i>                                           |                  |
| 85                             | 59  | HGSC                        | 3C        | 1                             | 0                       | 0                                                       | 0                     | 0                                                     | 0                   | 0                                                   |                  |
| 86                             | 67  | <i>LGSC</i>                 | <i>4</i>  | <i>0</i>                      | <i>NA</i>               | <i>NA</i>                                               | <i>0</i>              | <i>0</i>                                              | <i>NA</i>           | <i>NA</i>                                           | <i>Excluded*</i> |
| 107                            | 71  | HGSC                        | 4         | 1                             | 0                       | 0                                                       | <i>NA</i>             | <i>NA</i>                                             | 1                   | 0                                                   |                  |
| 114                            | 77  | <i>HGSC</i>                 | <i>99</i> | <i>0</i>                      | <i>1</i>                | <i>0</i>                                                | <i>NA</i>             | <i>NA</i>                                             | <i>0</i>            | <i>0</i>                                            | <i>Excluded*</i> |
| 124                            | 66  | HGSC                        | 3C        | 1                             | 0                       | 0                                                       | 0                     | 0                                                     | 0                   | 0                                                   |                  |
| 127                            | 54  | Clear cell/<br>endometrioid | 1C        | 2                             | 0                       | 0                                                       | 3                     | 1                                                     | <i>NA</i>           | <i>NA</i>                                           |                  |

|                         |    |                         |    |   |    |    |    |    |    |    |           |
|-------------------------|----|-------------------------|----|---|----|----|----|----|----|----|-----------|
| 130                     | 66 | Adenosquamous           | 2B | 2 | 0  | 0  | 0  | 0  | NA | NA |           |
| 135                     | 62 | HGSC                    | 3B | 2 | 1  | 1  | 0  | 0  | 4  | 1  |           |
| 151                     | 69 | HGSC                    | 3C | 1 | 0  | 0  | 2  | 1  | 0  | 0  |           |
| 160                     | 61 | HGSC                    | 3C | 1 | 0  | 0  | 0  | 0  | 0  | 0  |           |
| 164                     | 58 | HGSC                    | 3C | 0 | 0  | 0  | 0  | 0  | NA | NA | Excluded* |
| 165                     | 74 | Endometrioid            | 4  | 2 | 0  | 0  | 0  | 0  | 1  | 0  |           |
| 167                     | 69 | Serous/<br>endometrioid | 1A | 3 | 0  | 0  | 0  | 0  | 1  | 0  |           |
| 168                     | 83 | Endometrioid            | 2A | 1 | 1  | 0  | 1  | 1  | NA | NA |           |
| 181                     | 76 | HGSC                    | 4  | 0 | 0  | 0  | NA | NA | NA | NA | Excluded* |
| 184                     | 69 | HGSC                    | 3C | 1 | 1  | 0  | 1  | 0  | 1  | 0  |           |
| 188                     | 68 | HGSC                    | 3C | 1 | 0  | 0  | 0  | 0  | 0  | 0  |           |
| 196                     | 79 | HGSC                    | 3C | 2 | NA | NA | 0  | 0  | NA | NA |           |
| 197                     | 66 | HGSC                    | 3C | 0 | NA | NA | 0  | 0  | NA | NA | Excluded* |
| 198                     | 65 | HGSC                    | 3C | 3 | NA | NA | 3  | 3  | 0  | 0  |           |
| <b>Control patients</b> |    |                         |    |   |    |    |    |    |    |    |           |
| 4                       | 53 | Myoma                   | -  | 0 | 0  | 0  | 0  | 0  | 0  | 0  |           |
| 12                      | 59 | Mucinous<br>cystadenoma | -  | 0 | 0  | 0  | 0  | 0  | 0  | 0  |           |
| 28                      | 57 | Prolapse                | -  | 0 | 0  | 0  | 0  | 0  | 0  | 0  |           |
| 30                      | 66 | Simple<br>cystadenoma   | -  | 0 | 0  | 0  | 0  | 0  | 0  | 0  |           |
| 33                      | 71 | Simple<br>cystadenoma   | -  | 0 | 0  | 0  | 0  | 0  | 0  | 0  |           |
| 34                      | 63 | Teratoma                | -  | 0 | 0  | 0  | 0  | 0  | 0  | 0  |           |
| 38                      | 53 | Fibroma                 | -  | 0 | 0  | 0  | 1  | 0  | 0  | 0  |           |
| 53                      | 51 | Teratoma                | -  | 0 | 0  | 0  | 0  | 0  | 0  | 0  |           |
| 60                      | 57 | Mucinous<br>cystadenoma | -  | 0 | 0  | 0  | 0  | 0  | 1  | 0  |           |
| 62                      | 60 | Fibroma                 | -  | 0 | 0  | 0  | 0  | 0  | 0  | 0  |           |
| 67                      | 45 | Adenomyosis             | -  | 0 | 0  | 0  | 0  | 0  | 0  | 0  |           |

|     |    |                      |   |    |    |    |   |    |   |    |    |
|-----|----|----------------------|---|----|----|----|---|----|---|----|----|
| 68  | 63 | Mucinous cystadenoma | - | 1  | 0  | 0  | 0 | 0  | 0 | 0  | 0  |
| 73  | 51 | Myoma                | - | 0  | 0  | 0  | 0 | 0  | 0 | 0  | 0  |
| 74  | 72 | Mucinous cystadenoma | - | 1  | 0  | 0  | 0 | 0  | 0 | 0  | 0  |
| 76  | 59 | Myoma                | - | 0  | 0  | 0  | 0 | 0  | 0 | 0  | 0  |
| 89  | 53 | Teratoma             | - | 0  | 0  | 0  | 0 | 0  | 0 | 0  | 0  |
| 102 | 48 | Myoma                | - | 0  | 0  | 0  | 0 | 0  | 0 | 0  | 0  |
| 104 | 53 | Teratoma             | - | 0  | 0  | 0  | 0 | 0  | 0 | 0  | 0  |
| 115 | 63 | Mucinous cystadenoma | - | 0  | 0  | 0  | 0 | 0  | 0 | 0  | 0  |
| 116 | 58 | Myoma                | - | 0  | 0  | 0  | 0 | 0  | 0 | 0  | 0  |
| 125 | 51 | Mucinous cystadenoma | - | 0  | 0  | 0  | 0 | 0  | 0 | 0  | 0  |
| 129 | 72 | Serous cystadenoma   | - | 0  | 0  | 0  | 0 | 0  | 0 | 0  | 0  |
| 131 | 52 | Myoma                | - | 0  | 0  | 0  | 0 | 0  | 0 | 0  | 0  |
| 133 | 62 | Normal               | - | 0  | 0  | 0  | 0 | 0  | 0 | 0  | 0  |
| 136 | 48 | Myoma                | - | 0  | 0  | 0  | 0 | 0  | 0 | 0  | 0  |
| 144 | 50 | Myoma                | - | 0  | 0  | 0  | 0 | 0  | 0 | 0  | 0  |
| 150 | 46 | Myoma                | - | 0  | 1  | 0  | 0 | 0  | 1 | 0  | 0  |
| 153 | 47 | Normal               | - | 0  | 0  | 0  | 1 | 0  | 0 | 0  | 0  |
| 159 | 74 | Prolapse             | - | 0  | 0  | 0  | 0 | 0  | 0 | 0  | 0  |
| 166 | 82 | Inflammation         | - | 0  | 0  | 0  | 0 | 0  | 0 | 0  | 0  |
| 183 | 70 | Fibroma              | - | 0  | 0  | 0  | 0 | 0  | 0 | 0  | 0  |
| 195 |    | cystadenoma          | - | NA | NA | NA | 0 | NA | 0 | NA | NA |

\* Excluded from analysis as sequencing of the surgical specimen was unsuccessful: coverage was too low to potentially detect any variant  
 HGSC, high-grade serous cancer; LGSC, low-grade serous cancer; MMMT, Mixed Müllerian Tumor; NA, not applicable

**Supplementary Table 4. Identified pathogenic variants in the four specimens per patient**

| Ovarian cancer patients |                                |                  |                                     |                                   |                                 |                                           |
|-------------------------|--------------------------------|------------------|-------------------------------------|-----------------------------------|---------------------------------|-------------------------------------------|
| Patient ID              | Pathogenic variants            | Pathogenic class | VAF in self-sample % (mutant reads) | VAF in Pap smear % (mutant reads) | VAF in pipelle % (mutant reads) | VAF in surgical specimen % (mutant reads) |
| 8                       | PTEN:1008C>A p.(Tyr336*)       | 5                | no                                  | no                                | no                              | 5.2 (38)                                  |
| 8                       | TP53:c.747G>T p.(Arg249Ser)    | 5                | no                                  | no                                | no                              | 53.0 (184)                                |
| 10                      | PTEN:c.389G>A p.(Arg130Gln)    | 5                | no                                  | no                                | no                              | 5.7 (17)                                  |
| 18                      | TP53:c.743G>C p.(Arg248Pro)    | 5                | no                                  | 0.37 (10)                         | no                              | 52.0 (79)                                 |
| 20                      | TP53:c.743G>A p.(Arg248Gln)    | 4                | no                                  | 0.46 (14)                         | no                              | 100.0 (20)                                |
| 32*                     | none                           |                  | no                                  | no                                | no                              | no                                        |
| 39*                     | none                           |                  | no                                  | no                                | no                              | no                                        |
| 40                      | PIK3CA:c.1633G>A p.(Glu545Lys) | 5                | 1.3 (8)                             | no                                | no                              | no                                        |
| 40                      | TP53:c.*6T>C(3'UTR)            |                  | 1.0(18)                             | 5.4 (300)                         | 8.8 (14)                        | no                                        |
| 44                      | TP53:c.574C>T p.(Gln192*)      | 5                | no                                  | 1.4 (36)                          | no                              | no                                        |
| 45                      | TP53:c.814G>A p.(Val272Met)    | 5                | no                                  | NA                                | no                              | 56.0 (379)                                |
| 49                      | none                           |                  | no                                  | no                                | no                              | no                                        |
| 54*                     | none                           |                  | no                                  | no                                | no                              | no                                        |
| 55                      | KRAS:c.37G>T p.(Gly13Cys)      | 5                | no                                  | no                                | 5.7 (97)                        | no                                        |
| 55                      | PIK3CA:c.1624G>A p.(Glu542Lys) | 5                | 5.6 (32)                            | no                                | no                              | no                                        |
| 58                      | PIK3CA:c.1634A>G p.(Glu545Gly) | 5                | no                                  | 1.5 (19)                          | no                              | no                                        |
| 58                      | TP53:c.542G>A p.(Arg181His)    | 4                | 3.4 (18)                            | no                                | no                              | no                                        |
| 63                      | TP53:c.*6T>C(3'UTR)            |                  | no                                  | NA                                | no                              | 86.0 (111)                                |
| 65                      | TP53:c.832C>G p.(Pro278Ala)    | 5                | no                                  | no                                | NA                              | 73.0 (177)                                |
| 72                      | TP53:c.711G>T p.(Met237Ile)    | 5                | no                                  | no                                | no                              | 86.0 (89)                                 |
| 77                      | TP53:c.808_817del p.(Phe270fs) | 5                | no                                  | no                                | NA                              | 61.0 (81)                                 |
| 85                      | TP53:c.524G>A p.(Arg175His)    | 5                | no                                  | no                                | no                              | 55.0 (12)                                 |
| 86*                     | none                           |                  | NA                                  | no                                | NA                              | no                                        |
| 107                     | PIK3CA:c.277C>T p.(Arg93Trp)   | 4                | no                                  | NA                                | no                              | 13.0 (6)                                  |
| 107                     | TP53:c.818G>A p.(Arg273His)    | 5                | no                                  | NA                                | 2.4 (14)                        | no                                        |
| 114*                    | ARID1A:c.2063A>G p.(His688Arg) | 3                | 5.8 (12)                            | NA                                | no                              | no                                        |
| 124                     | TP53:c.672+1G>T p.?            | 5                | no                                  | no                                | no                              | 55.0 (22)                                 |
| 127                     | ARID1A:c.2911G>A p.(Gly971Arg) | 3                | no                                  | 4.6 (42)                          | NA                              | no                                        |
| 127                     | PIK3CA:c.1634A>C p.(Glu545Ala) | 5                | no                                  | 0.24 (8)                          | NA                              | 19.0 (235)                                |
| 127                     | PIK3CA:c.1634A>G p.(Glu545Gly) | 5                | no                                  | 0.95 (32)                         | NA                              | no                                        |
| 127                     | TP53:c.427G>A p.(Val143Met)    | 5                | no                                  | no                                | NA                              | 48.0 (68)                                 |
| 130                     | CTNBN1:c.121A>G p.(Thr41Ala)   | 5                | no                                  | no                                | NA                              | 38.0 (1360)                               |
| 130                     | PIK3CA:c.3203dup p.(Asn1068fs) | 5                | no                                  | no                                | NA                              | 36.0 (923)                                |
| 135                     | ARID1A:c.4993+1G>A p.?         | 5                | 0.10 (8)                            | no                                | 0.38 (6)                        | 3.4 (6)                                   |
| 135                     | KRAS:c.37G>T p.(Gly13Cys)      | 5                | no                                  | no                                | 35.0 (512)                      | no                                        |
| 135                     | PIK3CA:c.316G>C p.(Gly106Arg)  | 5                | no                                  | no                                | 40.0 (323)                      | no                                        |
| 135                     | PTEN: c.968dup p.(Asn323fs)    | 5                | no                                  | no                                | 80.0 (1117)                     | no                                        |
| 135                     | TP53:c.743G>A p.(Arg248Gln)    | 4                | no                                  | no                                | no                              | 72.0 (186)                                |
| 151                     | TP53:c.574C>T p.(Gln192*)      | 5                | no                                  | 2.3 (33)                          | no                              | no                                        |

|                         |                                       |   |          |            |             |             |
|-------------------------|---------------------------------------|---|----------|------------|-------------|-------------|
| 151                     | TP53:c.637_639delinsTGG p.(Arg213Trp) | 5 | no       | 0.18 (6)   | no          | 90.0 (19)   |
| 160                     | TP53:c.743G>C p.(Arg248Pro)           | 5 | no       | no         | no          | 71.0 (163)  |
| 164*                    | None                                  |   | no       | no         | NA          | no          |
| 165                     | CTNNB1:c.134C>T p.(Ser45Phe)          | 5 | no       | no         | no          | 4.5 (26)    |
| 165                     | MTOR:c.4448G>A p.(Cys1483Tyr)         | 5 | no       | no         | no          | 5.5 (62)    |
| 165                     | PIK3CA:c.1030G>A p.(Val344Met)        | 5 | no       | no         | 42.0 (1668) | no          |
| 167                     | CTNNB1:c.110C>G p.(Ser37Cys)          | 5 | no       | no         | no          | 27.0 (499)  |
| 167                     | KRAS:c.35G>T p.(Gly12Val)             | 5 | no       | no         | no          | 39.0 (1415) |
| 167                     | PIK3CA:c.323G>A p.(Arg108His)         | 5 | no       | no         | no          | 42.0 (1668) |
| 167                     | PIK3CA:c.1625A>T p.(Glu542Val)        | 4 | no       | no         | 9.2 (40)    | no          |
| 168                     | ARID1A:c.4101+2T>C p.?                | 5 | 1.2 (18) | no         | NA          | no          |
| 168                     | CTNNB1:c.110C>G p.(Ser37Cys)          | 5 | no       | 0.10 (7)   | NA          | 44.0 (72)   |
| 181*                    | none                                  |   | no       | NA         | NA          | no          |
| 184                     | PIK3CA:c.1634A>G p.(Glu545Gly)        | 5 | 0.4 (45) | 0.17 (12)  | 4.2 (6)     | no          |
| 184                     | TP53:c.839G>A p.(Arg280Lys)           | 4 | no       | no         | no          | 41.0 (898)  |
| 188                     | TP53:c.724T>A p.(Cys242Ser)           | 4 | no       | no         | no          | 87.0 (141)  |
| 196                     | PIK3CA:c.277C>T p.(Arg93Trp)          | 4 | NA       | no         | NA          | 70.0 (1574) |
| 196                     | TP53:c.747G>C p.(Arg249Ser)           | 5 | NA       | no         | NA          | 62.0 (281)  |
| 197*                    | none                                  |   | NA       | no         | NA          | no          |
| 198                     | KRAS:c.35G>T p.(Gly12Val)             | 5 | NA       | 4.7 (34)   | no          | 13.0 (6)    |
| 198                     | PIK3CA:c.277C>T p.(Arg93Trp)          | 4 | NA       | 6.15 (16)  | no          | 27.0 (75)   |
| 198                     | PTEN:c.955_958del p.(Thr319*)         | 5 | NA       | 12.0 (465) | no          | 63.0 (324)  |
| <b>Control patients</b> |                                       |   |          |            |             |             |
| 4                       | none                                  |   | no       | no         | no          | no          |
| 12                      | none                                  |   | no       | no         | no          | no          |
| 28                      | none                                  |   | no       | no         | no          | no          |
| 30                      | none                                  |   | no       | no         | no          | no          |
| 33                      | none                                  |   | no       | no         | no          | no          |
| 34                      | none                                  |   | no       | no         | no          | no          |
| 38                      | PIK3CA:c.1634A>G p.(Glu545Gly)        | 5 | no       | 1.8 (18)   | no          | no          |
| 53                      | none                                  |   | no       | no         | no          | no          |
| 60                      | PIK3CA:c.1634A>C p.(Glu545Ala)        | 5 | no       | no         | 3.7 (22)    | no          |
| 62                      | none                                  |   | no       | no         | no          | no          |
| 67                      | none                                  |   | no       | no         | no          | no          |
| 68                      | KRAS:c.37G>T p.(Gly13Cys)             | 5 | no       | no         | no          | 20.0 (303)  |
| 73                      | none                                  |   | no       | no         | no          | no          |
| 74                      | KRAS:c.35G>T p.(Gly12Val)             | 5 | no       | no         | no          | 30.0 (44)   |
| 76                      | none                                  |   | no       | no         | no          | no          |
| 89                      | none                                  |   | no       | no         | no          | no          |
| 102                     | none                                  |   | no       | no         | no          | no          |
| 104                     | none                                  |   | no       | no         | no          | no          |
| 115                     | none                                  |   | no       | no         | no          | no          |
| 116                     | none                                  |   | no       | no         | no          | no          |
| 125                     | none                                  |   | no       | no         | no          | no          |

|                                                                                                                                                                                                                                                                                                   |                                |   |          |         |          |    |
|---------------------------------------------------------------------------------------------------------------------------------------------------------------------------------------------------------------------------------------------------------------------------------------------------|--------------------------------|---|----------|---------|----------|----|
| 129                                                                                                                                                                                                                                                                                               | none                           |   | no       | no      | no       | no |
| 131                                                                                                                                                                                                                                                                                               | none                           |   | no       | no      | no       | no |
| 133                                                                                                                                                                                                                                                                                               | none                           |   | no       | no      | no       | no |
| 136                                                                                                                                                                                                                                                                                               | none                           |   | no       | no      | no       | no |
| 144                                                                                                                                                                                                                                                                                               | none                           |   | no       | no      | no       | no |
| 150                                                                                                                                                                                                                                                                                               | ARID1A:c.1270T>C p.(Ser424Pro) | 3 | 2.5 (20) | no      | no       | no |
| 150                                                                                                                                                                                                                                                                                               | PIK3CA:c.3203dup p.(Asn1068fs) | 5 | no       | no      | 2.5 (10) | no |
| 153                                                                                                                                                                                                                                                                                               | PIK3CA:c.1634A>G p.(Glu545Gly) | 5 | no       | 2.6 (6) | no       | no |
| 159                                                                                                                                                                                                                                                                                               | none                           |   | no       | no      | no       | no |
| 166                                                                                                                                                                                                                                                                                               | none                           |   | no       | no      | no       | no |
| 183                                                                                                                                                                                                                                                                                               | none                           |   | no       | no      | no       | no |
| 195                                                                                                                                                                                                                                                                                               | none                           |   | NA       | no      | no       | NA |
| <p>* Excluded from analysis as sequencing of the surgical specimen was unsuccessful: coverage was too low to potentially detect any variant<br/> VAF, variant allele frequency; NA, not applicable; Pathogenic class: 3, variant of unknown significance; 4, likely pathogenic; 5, pathogenic</p> |                                |   |          |         |          |    |



**Supplementary Document 2. Detection rate per sampling method by stage**

In table:

|                   | All stages |      | Early stage<br>(I/II) |      | Late stage<br>(III/IV) |      |
|-------------------|------------|------|-----------------------|------|------------------------|------|
|                   | n          | %    | n                     | %    | n                      | %    |
| Self-sample       | 6/27       | 22.2 | 1/7                   | 14.3 | 5/20                   | 25.0 |
| Pap smear         | 10/26      | 38.5 | 3/5                   | 60.0 | 7/21                   | 33.3 |
| Pipelle           | 7/23       | 30.4 | 1/4                   | 25.0 | 6/19                   | 31.6 |
| Surgical specimen | 24/29      | 82.8 | 7/7                   | 100  | 17/22                  | 77.3 |
| Total             | 28/29      | 96.6 | 7/7                   | 100  | 21/22                  | 95.5 |

In figure:

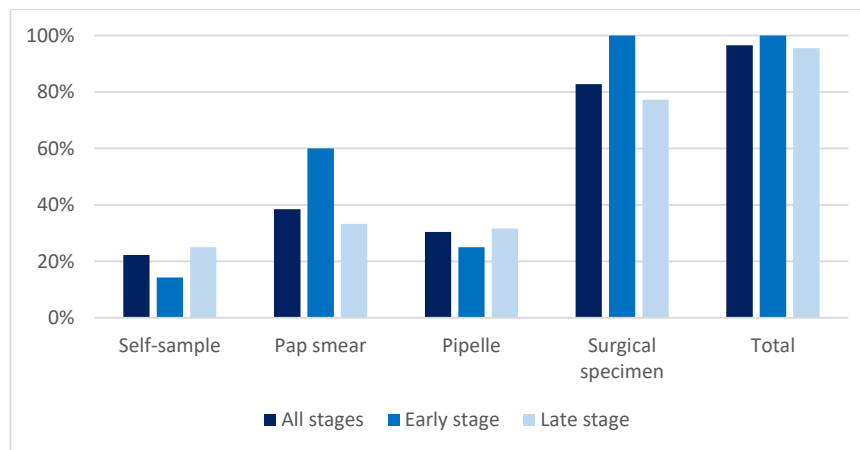

Supplement: ijgc-2022-003911supp001_data_supplement.pdf [file ijgc-2022-003911supp001_data_supplement.pdf]
